# Supplementary material
Source: publisher figshare collection journal article supplement (https://acs.figshare.com/ndownloader/files/5158618)
Supplement: Supplementary file 1 [file 5158618]

data_General
_publ_requested_journal          J.Am.Chem.Soc.

#==============================================================================

# SUBMISSION DETAILS

_publ_contact_author_name        'Koichi Mikami'
_publ_contact_author_address     
;Department of Applied Chemistry
Tokyo Institute of Technology
Tokyo
Japan
;
_publ_contact_author_email       kmikami@o.cc.titech.ac.jp
_publ_contact_author_phone       +81(3)5734-2776
_publ_contact_author_fax         +81(3)5734-2776
loop_
_publ_author_name
_publ_author_address
'Itoh, Yoshimitsu'
;Department of Applied Chemistry
Tokyo Institute of Technology
Tokyo
Japan
;
'Yamanaka, Masahiro'
;
  FIRST AUTHORS ADDRESS
;
'Mikami, Koichi'
;
  FIRST AUTHORS ADDRESS
;
_audit_creation_date             2004-01-22
_audit_creation_method           'by CrystalStructure v3.16'
_audit_update_record             ?

#==============================================================================

# PROCESSING SUMMARY (IUCr Office Use Only)

_journal_date_recd_electronic    ?
_journal_date_from_coeditor      ?
_journal_date_accepted           ?
_journal_coeditor_code           ?
_publ_contact_letter             
;
    ENTER TEXT OF LETTER
;
_publ_requested_category         ?
_publ_requested_coeditor_name    ?

#==============================================================================

# TITLE AND AUTHOR LIST

_publ_section_title              
;
    ENTER SECTION TITLE
;
_publ_section_title_footnote     
;
    ENTER FOOTNOTE TO TITLE OF PAPER
;
loop_
_publ_author_footnote
;
  FIRST AUTHORS FOOTNOTES
;
_publ_section_synopsis           
;
  ENTER SYNOPSIS
;

#==============================================================================

# TEXT

_publ_section_abstract           
;
    ENTER ABSTRACT
;
_publ_section_comment            
;
    ENTER TEXT
;
_publ_section_references         
;
    ENTER OTHER REFERENCES

    Rigaku/MSC and Rigaku Corporation. (2001).
    CrystalStructure.
    Single Crystal Structure Analysis Software. Version 3.16.
    Rigaku/MSC, 9009 New Trails Drive, The Woodlands, TX, USA 77381-5209.
    Rigaku, 3-9-12 Akishima, Tokyo 196-8666, Japan.

    Watkin, D.J., Prout, C.K. Carruthers, J.R. & Betteridge, P.W. (1996)
    CRYSTALS Issue 10, Chemical Crystallography Laboratory, Oxford, UK.

;
_publ_section_figure_captions    
;
    ENTER FIGURE CAPTIONS
;
_publ_section_exptl_prep         
;
    ENTER COMPOUND PREPARATION DETAILS
;
_publ_section_exptl_refinement   
;
    ENTER SPECIAL DETAILS OF THE REFINEMENT
;

#==============================================================================

data___5-Hydroxy-2,2-dimethyl-1,5-diphenyl-4-trifluoromethyl-3-pentanone

#==============================================================================

# CHEMICAL DATA

_chemical_formula_sum                  'C20 H21 F3 O2 '
_chemical_formula_moiety               'C20 H21 F3 O2 '
_chemical_formula_weight               350.38
_chemical_melting_point                ?

#==============================================================================

# CRYSTAL DATA
_symmetry_cell_setting                 triclinic
_symmetry_space_group_name_H-M        'P -1       '
_symmetry_Int_Tables_number            2
loop_
_symmetry_equiv_pos_as_xyz
 'x,y,z'
 '-x,-y,-z'

#------------------------------------------------------------------------------

_cell_length_a                         6.469(4)
_cell_length_b                         10.934(6)
_cell_length_c                         13.371(9)
_cell_angle_alpha                      73.90(2)
_cell_angle_beta                       88.25(3)
_cell_angle_gamma                      76.29(2)
_cell_volume                           882.2(10)
_cell_formula_units_Z                  2
_cell_measurement_reflns_used          3337
_cell_measurement_theta_min            2.9
_cell_measurement_theta_max            31.5
_cell_measurement_temperature          193.1

#------------------------------------------------------------------------------

_exptl_crystal_description            'prism'
_exptl_crystal_colour                 'colorless'
_exptl_crystal_size_max                0.20
_exptl_crystal_size_mid                0.20
_exptl_crystal_size_min                0.20
_exptl_crystal_density_diffrn          1.319
_exptl_crystal_density_meas            ?
_exptl_crystal_density_method         'not measured'
_exptl_crystal_F_000                   368.00
_exptl_absorpt_coefficient_mu          0.105
_exptl_absorpt_correction_type         multi-scan
_exptl_absorpt_process_details         
'Jacobson, R. (1998) Private communication'
_exptl_absorpt_correction_T_min        0.459
_exptl_absorpt_correction_T_max        0.979

#==============================================================================

# EXPERIMENTAL DATA

_diffrn_radiation_type                'Mo K\a'
_diffrn_radiation_wavelength           0.7107
_diffrn_measurement_device_type       'Rigaku Saturn'
_diffrn_measurement_method             \w
_diffrn_detector_area_resol_mean       7.31
_diffrn_reflns_number                  3713
_diffrn_reflns_av_R_equivalents        0.018
_diffrn_reflns_theta_max               31.20
_diffrn_measured_fraction_theta_max    0.6070
_diffrn_reflns_theta_full              31.20
_diffrn_measured_fraction_theta_full   0.6070
_diffrn_reflns_limit_h_min             -8
_diffrn_reflns_limit_h_max             8
_diffrn_reflns_limit_k_min             -11
_diffrn_reflns_limit_k_max             15
_diffrn_reflns_limit_l_min             -10
_diffrn_reflns_limit_l_max             18

#==============================================================================

# REFINEMENT DATA

_refine_special_details
;
    Refinement using reflections with F^2^ > 0.0 sigma(F^2^).
    The weighted R-factor (wR) and goodness of fit (S) are based on F^2^.
    R-factor (gt) are based on F. The threshold expression of
    F^2^ > 2.0 sigma(F^2^) is used only for calculating R-factor (gt).
;
_reflns_number_total                   3486
_reflns_number_gt                      3479
_reflns_threshold_expression           F^2^>2.0\s(F^2^)
_refine_ls_structure_factor_coef       Fsqd
_refine_ls_R_factor_gt                 0.0960
_refine_ls_wR_factor_ref               0.1620
_refine_ls_hydrogen_treatment          refall
_refine_ls_number_reflns               3486
_refine_ls_number_parameters           247
_refine_ls_goodness_of_fit_ref         0.991
_refine_ls_weighting_scheme            calc
_refine_ls_weighting_details
'w = 1/[0.0000Fo^2^ + 2.0000\s^2^(Fo) + 0.9800]/(4Fo^2^)'
_refine_ls_shift/su_max                0.0000
_refine_diff_density_max               0.28
_refine_diff_density_min               -0.27
_refine_ls_extinction_method           none
_refine_ls_extinction_coef             ?

loop_
_atom_type_symbol
_atom_type_description
_atom_type_scat_dispersion_real
_atom_type_scat_dispersion_imag
_atom_type_scat_source
  'C' 'C'  0.003 0.002 
;
International Tables for Crystallography
(1992, Vol. C, Tables 4.2.6.8 and 6.1.1.4)
;
  'H' 'H'  0.000 0.000 
;
International Tables for Crystallography
(1992, Vol. C, Table 6.1.1.4)
;
  'F' 'F'  0.017 0.010 
;
International Tables for Crystallography
(1992, Vol. C, Tables 4.2.6.8 and 6.1.1.4)
;
  'O' 'O'  0.011 0.006 
;
International Tables for Crystallography
(1992, Vol. C, Tables 4.2.6.8 and 6.1.1.4)
;

#==============================================================================

# ATOMIC COORDINATES AND THERMAL PARAMETERS

loop_
_atom_site_label
_atom_site_type_symbol
_atom_site_fract_x
_atom_site_fract_y
_atom_site_fract_z
_atom_site_U_iso_or_equiv
_atom_site_adp_type
_atom_site_occupancy
_atom_site_symmetry_multiplicity
_atom_site_calc_flag
_atom_site_refinement_flags
_atom_site_disorder_assembly
_atom_site_disorder_group
 F(2)   F  -0.1830(4)  0.4627(2)   0.4477(1)   0.0613(6)   Uani 1.00 1 d . . .
 F(3)   F  -0.2630(3)  0.3892(2)   0.60549(13) 0.0589(6)   Uani 1.00 1 d . . .
 F(4)   F  -0.3657(3)  0.3180(2)   0.4871(2)   0.0642(7)   Uani 1.00 1 d . . .
 O(1)   O  -0.1403(3)  0.0755(2)   0.6426(1)   0.0450(6)   Uani 1.00 1 d . . .
 O(2)   O  0.2374(4)   0.0839(2)   0.4807(1)   0.0455(6)   Uani 1.00 1 d . . .
 C(1)   C  0.2446(5)   0.2422(3)   0.8551(2)   0.0360(7)   Uani 1.00 1 d . . .
 C(2)   C  0.1826(5)   0.1996(3)   0.9575(2)   0.0430(8)   Uani 1.00 1 d . . .
 C(3)   C  0.3066(6)   0.2008(3)   1.0401(2)   0.0497(9)   Uani 1.00 1 d . . .
 C(4)   C  0.4895(6)   0.2435(3)   1.0226(2)   0.0539(10)  Uani 1.00 1 d . . .
 C(5)   C  0.5524(6)   0.2854(4)   0.9219(3)   0.0546(11)  Uani 1.00 1 d . . .
 C(6)   C  0.0598(5)   0.2740(3)   0.3431(2)   0.0358(7)   Uani 1.00 1 d . . .
 C(7)   C  0.4309(5)   0.2833(3)   0.8392(2)   0.0463(9)   Uani 1.00 1 d . . .
 C(8)   C  -0.1051(5)  0.3117(3)   0.2683(2)   0.0445(9)   Uani 1.00 1 d . . .
 C(9)   C  0.0755(6)   0.0123(3)   0.8245(2)   0.0533(10)  Uani 1.00 1 d . . .
 C(10)  C  0.1048(5)   0.2475(3)   0.7645(2)   0.0367(7)   Uani 1.00 1 d . . .
 C(11)  C  0.0018(4)   0.2471(3)   0.5377(2)   0.0319(7)   Uani 1.00 1 d . . .
 C(12)  C  0.1356(5)   0.1176(3)   0.7345(2)   0.0354(7)   Uani 1.00 1 d . . .
 C(13)  C  -0.0916(6)  0.4002(3)   0.1731(2)   0.0515(9)   Uani 1.00 1 d . . .
 C(14)  C  0.0860(6)   0.4502(3)   0.1515(2)   0.0517(9)   Uani 1.00 1 d . . .
 C(15)  C  -0.2008(5)  0.3526(3)   0.5190(2)   0.0442(9)   Uani 1.00 1 d . . .
 C(16)  C  0.3663(5)   0.0711(4)   0.7059(3)   0.0508(10)  Uani 1.00 1 d . . .
 C(18)  C  0.0443(5)   0.1797(3)   0.4485(2)   0.0353(7)   Uani 1.00 1 d . . .
 C(19)  C  0.2384(5)   0.3235(3)   0.3200(2)   0.0449(9)   Uani 1.00 1 d . . .
 C(20)  C  -0.0118(4)  0.1407(3)   0.6399(2)   0.0329(7)   Uani 1.00 1 d . . .
 C(21)  C  0.2519(6)   0.4118(3)   0.2246(2)   0.0525(10)  Uani 1.00 1 d . . .
 H(1)   H  0.0558(5)   0.1691(3)   0.9706(2)   0.052(1)    Uiso 1.00 1 c . . .
 H(2)   H  0.2625(6)   0.1724(3)   1.1094(2)   0.059(2)    Uiso 1.00 1 c . . .
 H(3)   H  0.5729(6)   0.2436(3)   1.0799(2)   0.065(2)    Uiso 1.00 1 c . . .
 H(4)   H  0.6795(6)   0.3155(4)   0.9092(3)   0.069(2)    Uiso 1.00 1 c . . .
 H(5)   H  0.4753(5)   0.3111(3)   0.7699(2)   0.057(2)    Uiso 1.00 1 c . . .
 H(6)   H  -0.0395(5)  0.2726(3)   0.7820(2)   0.0435(13)  Uiso 1.00 1 c . . .
 H(7)   H  0.1340(5)   0.3121(3)   0.7055(2)   0.0432(13)  Uiso 1.00 1 c . . .
 H(8)   H  -0.0688(6)  0.0423(3)   0.8400(2)   0.063(2)    Uiso 1.00 1 c . . .
 H(9)   H  0.0917(6)   -0.0664(3)  0.8048(2)   0.063(2)    Uiso 1.00 1 c . . .
 H(10)  H  0.1643(6)   -0.0037(3)  0.8843(2)   0.063(2)    Uiso 1.00 1 c . . .
 H(11)  H  0.3822(5)   -0.0085(4)  0.6875(3)   0.061(2)    Uiso 1.00 1 c . . .
 H(12)  H  0.4015(5)   0.1357(4)   0.6487(3)   0.061(2)    Uiso 1.00 1 c . . .
 H(13)  H  0.4584(5)   0.0568(4)   0.7641(3)   0.061(2)    Uiso 1.00 1 c . . .
 H(14)  H  0.1178(4)   0.2843(3)   0.5439(2)   0.0377(13)  Uiso 1.00 1 c . . .
 H(15)  H  -0.0669(5)  0.1376(3)   0.4451(2)   0.0423(13)  Uiso 1.00 1 c . . .
 H(16)  H  -0.2270(5)  0.2764(3)   0.2831(2)   0.054(1)    Uiso 1.00 1 c . . .
 H(17)  H  -0.2049(6)  0.4263(3)   0.1224(2)   0.060(2)    Uiso 1.00 1 c . . .
 H(18)  H  0.0946(6)   0.5111(3)   0.0861(2)   0.061(2)    Uiso 1.00 1 c . . .
 H(19)  H  0.3745(6)   0.4464(3)   0.2095(2)   0.064(2)    Uiso 1.00 1 c . . .
 H(20)  H  0.3525(5)   0.2961(3)   0.3704(2)   0.055(1)    Uiso 1.00 1 c . . .
 H(21)  H  0.2567(4)   0.0308(2)   0.4373(1)   0.0537(13)  Uiso 1.00 1 c . . .


loop_
_atom_site_aniso_label
_atom_site_aniso_U_11
_atom_site_aniso_U_22
_atom_site_aniso_U_33
_atom_site_aniso_U_12
_atom_site_aniso_U_13
_atom_site_aniso_U_23
 F(2)   0.078(2)    0.0432(10)  0.0481(10)  0.0019(11)  -0.0017(9)  -0.0029(8) 
 F(3)   0.0555(13)  0.0684(13)  0.0441(9)   0.0121(11)  -0.0016(8)  -0.0242(9) 
 F(4)   0.0379(13)  0.078(1)    0.0757(13)  -0.0011(11) -0.0181(9)  -0.0290(11)
 O(1)   0.045(1)    0.0566(13)  0.0397(10)  -0.0242(11) 0.0086(9)   -0.0147(9) 
 O(2)   0.055(2)    0.0423(11)  0.0368(10)  -0.0033(12) 0.0044(9)   -0.0138(8) 
 C(1)   0.040(2)    0.036(1)    0.0325(12)  -0.009(1)   0.0010(11)  -0.0098(10)
 C(2)   0.044(2)    0.053(2)    0.0332(12)  -0.014(2)   0.0034(12)  -0.0113(12)
 C(3)   0.059(2)    0.055(2)    0.0330(13)  -0.009(2)   -0.0026(13) -0.0116(12)
 C(4)   0.054(2)    0.060(2)    0.048(2)    -0.005(2)   -0.009(2)   -0.022(2)  
 C(5)   0.041(2)    0.060(2)    0.070(2)    -0.018(2)   -0.001(2)   -0.026(2)  
 C(6)   0.042(2)    0.038(1)    0.0296(11)  -0.011(1)   0.0027(11)  -0.0116(10)
 C(7)   0.047(2)    0.051(2)    0.043(1)    -0.016(2)   0.0064(13)  -0.0142(13)
 C(8)   0.042(2)    0.058(2)    0.0364(13)  -0.012(2)   0.0008(12)  -0.0172(13)
 C(9)   0.074(3)    0.045(2)    0.038(1)    -0.020(2)   -0.003(1)   -0.0019(12)
 C(10)  0.040(2)    0.038(1)    0.0303(11)  -0.008(1)   0.0009(11)  -0.0083(10)
 C(11)  0.031(2)    0.0341(13)  0.0304(11)  -0.0078(13) -0.0016(10) -0.0079(10)
 C(12)  0.038(2)    0.036(1)    0.0318(11)  -0.009(1)   0.0021(11)  -0.0078(10)
 C(13)  0.060(2)    0.055(2)    0.036(1)    -0.004(2)   -0.005(1)   -0.0135(13)
 C(14)  0.076(3)    0.042(2)    0.0340(13)  -0.012(2)   0.012(1)    -0.0089(12)
 C(15)  0.043(2)    0.052(2)    0.0374(13)  -0.007(2)   -0.0002(12) -0.0169(13)
 C(16)  0.039(2)    0.063(2)    0.050(2)    0.000(2)    -0.001(1)   -0.026(2)  
 C(18)  0.037(2)    0.037(1)    0.0326(11)  -0.008(1)   0.0011(11)  -0.0112(10)
 C(19)  0.048(2)    0.051(2)    0.0367(13)  -0.018(2)   -0.0008(12) -0.0089(12)
 C(20)  0.027(2)    0.038(1)    0.0339(12)  -0.0057(13) 0.0066(10)  -0.0132(10)
 C(21)  0.060(2)    0.058(2)    0.043(2)    -0.025(2)   0.010(1)    -0.011(1)  

#==============================================================================

_computing_data_collection            'CrystalClear'
_computing_cell_refinement            'CrystalClear'
_computing_data_reduction             'CrystalStructure'
_computing_structure_solution         'SIR92'
_computing_structure_refinement       'CRYSTALS'
_computing_publication_material       'CrystalStructure Ver. 3.16'
_computing_molecular_graphics          ?

#==============================================================================

# MOLECULAR GEOMETRY

_geom_special_details
;
    ENTER SPECIAL DETAILS OF THE MOLECULAR GEOMETRY
;

loop_
_geom_bond_atom_site_label_1
_geom_bond_atom_site_label_2
_geom_bond_distance
_geom_bond_publ_flag
_geom_bond_site_symmetry_1
_geom_bond_site_symmetry_2
F(2)      C(15)     1.339(4)    yes  . .
F(3)      C(15)     1.346(4)    yes  . .
F(4)      C(15)     1.331(5)    yes  . .
O(1)      C(20)     1.211(4)    yes  . .
O(2)      C(18)     1.417(3)    yes  . .
O(2)      H(21)     0.915(3)    no   . .
C(1)      C(2)      1.398(4)    yes  . .
C(1)      C(7)      1.373(5)    yes  . .
C(1)      C(10)     1.515(4)    yes  . .
C(2)      C(3)      1.389(5)    yes  . .
C(2)      H(1)      0.950(5)    no   . .
C(3)      C(4)      1.363(6)    yes  . .
C(3)      H(2)      0.950(4)    no   . .
C(4)      C(5)      1.379(5)    yes  . .
C(4)      H(3)      0.950(5)    no   . .
C(5)      C(7)      1.385(5)    yes  . .
C(5)      H(4)      0.950(6)    no   . .
C(6)      C(8)      1.392(4)    yes  . .
C(6)      C(18)     1.513(3)    yes  . .
C(6)      C(19)     1.380(5)    yes  . .
C(7)      H(5)      0.950(4)    no   . .
C(8)      C(13)     1.383(4)    yes  . .
C(8)      H(16)     0.950(5)    no   . .
C(9)      C(12)     1.529(4)    yes  . .
C(9)      H(8)      0.950(5)    no   . .
C(9)      H(9)      0.950(5)    no   . .
C(9)      H(10)     0.950(5)    no   . .
C(10)     C(12)     1.547(4)    yes  . .
C(10)     H(6)      0.950(4)    no   . .
C(10)     H(7)      0.950(4)    no   . .
C(11)     C(15)     1.501(4)    yes  . .
C(11)     C(18)     1.554(4)    yes  . .
C(11)     C(20)     1.545(3)    yes  . .
C(11)     H(14)     0.950(4)    no   . .
C(12)     C(16)     1.531(4)    yes  . .
C(12)     C(20)     1.534(4)    yes  . .
C(13)     C(14)     1.376(6)    yes  . .
C(13)     H(17)     0.950(5)    no   . .
C(14)     C(21)     1.381(5)    yes  . .
C(14)     H(18)     0.950(4)    no   . .
C(16)     H(11)     0.950(6)    no   . .
C(16)     H(12)     0.950(5)    no   . .
C(16)     H(13)     0.950(5)    no   . .
C(18)     H(15)     0.950(5)    no   . .
C(19)     C(21)     1.384(4)    yes  . .
C(19)     H(20)     0.950(4)    no   . .
C(21)     H(19)     0.950(6)    no   . .

loop_
_geom_angle_atom_site_label_1
_geom_angle_atom_site_label_2
_geom_angle_atom_site_label_3
_geom_angle
_geom_angle_publ_flag
_geom_angle_site_symmetry_1
_geom_angle_site_symmetry_2
_geom_angle_site_symmetry_3
C(18)     O(2)      H(21)     107.5(3)    no    . . .
C(2)      C(1)      C(7)      118.3(3)    yes   . . .
C(2)      C(1)      C(10)     120.5(3)    yes   . . .
C(7)      C(1)      C(10)     121.2(2)    yes   . . .
C(3)      C(2)      H(1)      120.0(3)    no    . . .
C(3)      C(2)      C(1)      120.2(3)    yes   . . .
H(1)      C(2)      C(1)      119.8(4)    no    . . .
C(4)      C(3)      H(2)      119.8(4)    no    . . .
C(4)      C(3)      C(2)      120.6(3)    yes   . . .
H(2)      C(3)      C(2)      119.6(4)    no    . . .
C(5)      C(4)      H(3)      120.7(4)    no    . . .
C(5)      C(4)      C(3)      119.6(3)    yes   . . .
H(3)      C(4)      C(3)      119.7(4)    no    . . .
C(7)      C(5)      H(4)      119.9(4)    no    . . .
C(7)      C(5)      C(4)      120.1(4)    yes   . . .
H(4)      C(5)      C(4)      120.0(4)    no    . . .
C(8)      C(6)      C(18)     120.6(3)    yes   . . .
C(8)      C(6)      C(19)     119.1(2)    yes   . . .
C(18)     C(6)      C(19)     120.3(3)    yes   . . .
H(5)      C(7)      C(1)      118.8(4)    no    . . .
H(5)      C(7)      C(5)      120.1(4)    no    . . .
C(1)      C(7)      C(5)      121.1(3)    yes   . . .
C(13)     C(8)      H(16)     120.3(3)    no    . . .
C(13)     C(8)      C(6)      120.2(3)    yes   . . .
H(16)     C(8)      C(6)      119.5(3)    no    . . .
C(12)     C(9)      H(8)      108.7(3)    no    . . .
C(12)     C(9)      H(9)      109.7(3)    no    . . .
C(12)     C(9)      H(10)     110.0(4)    no    . . .
H(8)      C(9)      H(9)      109.5(5)    no    . . .
H(8)      C(9)      H(10)     109.5(4)    no    . . .
H(9)      C(9)      H(10)     109.5(4)    no    . . .
C(12)     C(10)     H(6)      108.0(4)    no    . . .
C(12)     C(10)     H(7)      108.0(3)    no    . . .
C(12)     C(10)     C(1)      115.5(2)    yes   . . .
H(6)      C(10)     H(7)      109.5(3)    no    . . .
H(6)      C(10)     C(1)      108.0(3)    no    . . .
H(7)      C(10)     C(1)      107.9(4)    no    . . .
C(15)     C(11)     C(18)     112.5(2)    yes   . . .
C(15)     C(11)     C(20)     109.3(2)    yes   . . .
C(15)     C(11)     H(14)     109.1(3)    no    . . .
C(18)     C(11)     C(20)     107.9(2)    yes   . . .
C(18)     C(11)     H(14)     108.8(3)    no    . . .
C(20)     C(11)     H(14)     109.2(3)    no    . . .
C(16)     C(12)     C(20)     108.8(2)    yes   . . .
C(16)     C(12)     C(9)      110.0(2)    yes   . . .
C(16)     C(12)     C(10)     110.6(3)    yes   . . .
C(20)     C(12)     C(9)      108.3(3)    yes   . . .
C(20)     C(12)     C(10)     108.8(2)    yes   . . .
C(9)      C(12)     C(10)     110.2(2)    yes   . . .
C(14)     C(13)     H(17)     119.8(4)    no    . . .
C(14)     C(13)     C(8)      120.2(3)    yes   . . .
H(17)     C(13)     C(8)      120.0(4)    no    . . .
C(21)     C(14)     H(18)     120.0(5)    no    . . .
C(21)     C(14)     C(13)     120.1(3)    yes   . . .
H(18)     C(14)     C(13)     119.9(4)    no    . . .
F(2)      C(15)     F(3)      105.3(3)    yes   . . .
F(2)      C(15)     F(4)      106.3(2)    yes   . . .
F(2)      C(15)     C(11)     112.9(3)    yes   . . .
F(3)      C(15)     F(4)      105.6(3)    yes   . . .
F(3)      C(15)     C(11)     112.2(2)    yes   . . .
F(4)      C(15)     C(11)     113.9(3)    yes   . . .
H(11)     C(16)     H(12)     109.5(5)    no    . . .
H(11)     C(16)     H(13)     109.5(4)    no    . . .
H(11)     C(16)     C(12)     109.5(4)    no    . . .
H(12)     C(16)     H(13)     109.5(5)    no    . . .
H(12)     C(16)     C(12)     109.7(3)    no    . . .
H(13)     C(16)     C(12)     109.2(4)    no    . . .
H(15)     C(18)     O(2)      109.3(3)    no    . . .
H(15)     C(18)     C(6)      109.2(3)    no    . . .
H(15)     C(18)     C(11)     108.9(3)    no    . . .
O(2)      C(18)     C(6)      112.0(2)    yes   . . .
O(2)      C(18)     C(11)     104.0(2)    yes   . . .
C(6)      C(18)     C(11)     113.3(2)    yes   . . .
C(21)     C(19)     H(20)     120.2(4)    no    . . .
C(21)     C(19)     C(6)      120.7(3)    yes   . . .
H(20)     C(19)     C(6)      119.1(3)    no    . . .
O(1)      C(20)     C(11)     118.0(2)    yes   . . .
O(1)      C(20)     C(12)     121.2(2)    yes   . . .
C(11)     C(20)     C(12)     120.8(3)    yes   . . .
H(19)     C(21)     C(14)     119.9(3)    no    . . .
H(19)     C(21)     C(19)     120.3(4)    no    . . .
C(14)     C(21)     C(19)     119.8(4)    yes   . . .

loop_
_geom_torsion_atom_site_label_1
_geom_torsion_atom_site_label_2
_geom_torsion_atom_site_label_3
_geom_torsion_atom_site_label_4
_geom_torsion
_geom_torsion_publ_flag
_geom_torsion_site_symmetry_1
_geom_torsion_site_symmetry_2
_geom_torsion_site_symmetry_3
_geom_torsion_site_symmetry_4
H(21)     O(2)      C(18)     C(6)      -68.0(3)    no    . . . .
H(21)     O(2)      C(18)     C(11)     169.3(3)    no    . . . .
H(21)     O(2)      C(18)     H(15)     53.1(4)     no    . . . .
C(7)      C(1)      C(2)      C(3)      0.7(4)      yes   . . . .
C(7)      C(1)      C(2)      H(1)      -178.8(4)   no    . . . .
C(10)     C(1)      C(2)      C(3)      -177.0(3)   yes   . . . .
C(10)     C(1)      C(2)      H(1)      3.5(5)      no    . . . .
C(2)      C(1)      C(7)      C(5)      -1.4(5)     yes   . . . .
C(2)      C(1)      C(7)      H(5)      179.0(4)    no    . . . .
C(10)     C(1)      C(7)      C(5)      176.3(3)    yes   . . . .
C(10)     C(1)      C(7)      H(5)      -3.3(5)     no    . . . .
C(2)      C(1)      C(10)     C(12)     -85.1(3)    yes   . . . .
C(2)      C(1)      C(10)     H(6)      35.8(4)     no    . . . .
C(2)      C(1)      C(10)     H(7)      154.0(3)    no    . . . .
C(7)      C(1)      C(10)     C(12)     97.2(3)     yes   . . . .
C(7)      C(1)      C(10)     H(6)      -141.9(3)   no    . . . .
C(7)      C(1)      C(10)     H(7)      -23.7(4)    no    . . . .
C(1)      C(2)      C(3)      C(4)      0.1(5)      yes   . . . .
C(1)      C(2)      C(3)      H(2)      179.4(4)    no    . . . .
H(1)      C(2)      C(3)      C(4)      179.6(4)    no    . . . .
H(1)      C(2)      C(3)      H(2)      -1.1(6)     no    . . . .
C(2)      C(3)      C(4)      C(5)      -0.3(5)     yes   . . . .
C(2)      C(3)      C(4)      H(3)      -179.9(51)  no    . . . .
H(2)      C(3)      C(4)      C(5)      -179.6(4)   no    . . . .
H(2)      C(3)      C(4)      H(3)      0.8(6)      no    . . . .
C(3)      C(4)      C(5)      C(7)      -0.4(5)     yes   . . . .
C(3)      C(4)      C(5)      H(4)      179.8(36)   no    . . . .
H(3)      C(4)      C(5)      C(7)      179.2(4)    no    . . . .
H(3)      C(4)      C(5)      H(4)      -0.6(7)     no    . . . .
C(4)      C(5)      C(7)      C(1)      1.2(5)      yes   . . . .
C(4)      C(5)      C(7)      H(5)      -179.1(4)   no    . . . .
H(4)      C(5)      C(7)      C(1)      -178.9(4)   no    . . . .
H(4)      C(5)      C(7)      H(5)      0.7(6)      no    . . . .
C(18)     C(6)      C(8)      C(13)     178.5(3)    yes   . . . .
C(18)     C(6)      C(8)      H(16)     -1.4(5)     no    . . . .
C(19)     C(6)      C(8)      C(13)     -1.6(5)     yes   . . . .
C(19)     C(6)      C(8)      H(16)     178.5(4)    no    . . . .
C(8)      C(6)      C(18)     O(2)      136.8(3)    yes   . . . .
C(8)      C(6)      C(18)     C(11)     -106.0(3)   yes   . . . .
C(8)      C(6)      C(18)     H(15)     15.5(4)     no    . . . .
C(19)     C(6)      C(18)     O(2)      -43.2(4)    yes   . . . .
C(19)     C(6)      C(18)     C(11)     74.1(3)     yes   . . . .
C(19)     C(6)      C(18)     H(15)     -164.4(3)   no    . . . .
C(8)      C(6)      C(19)     C(21)     1.5(5)      yes   . . . .
C(8)      C(6)      C(19)     H(20)     -178.5(4)   no    . . . .
C(18)     C(6)      C(19)     C(21)     -178.6(3)   yes   . . . .
C(18)     C(6)      C(19)     H(20)     1.5(5)      no    . . . .
C(6)      C(8)      C(13)     C(14)     0.8(5)      yes   . . . .
C(6)      C(8)      C(13)     H(17)     -179.6(4)   no    . . . .
H(16)     C(8)      C(13)     C(14)     -179.3(4)   no    . . . .
H(16)     C(8)      C(13)     H(17)     0.3(7)      no    . . . .
H(8)      C(9)      C(12)     C(10)     59.0(5)     no    . . . .
H(8)      C(9)      C(12)     C(16)     -178.8(4)   no    . . . .
H(8)      C(9)      C(12)     C(20)     -59.9(4)    no    . . . .
H(9)      C(9)      C(12)     C(10)     178.7(4)    no    . . . .
H(9)      C(9)      C(12)     C(16)     -59.1(5)    no    . . . .
H(9)      C(9)      C(12)     C(20)     59.7(4)     no    . . . .
H(10)     C(9)      C(12)     C(10)     -60.9(4)    no    . . . .
H(10)     C(9)      C(12)     C(16)     61.3(4)     no    . . . .
H(10)     C(9)      C(12)     C(20)     -179.8(3)   no    . . . .
C(1)      C(10)     C(12)     C(9)      63.1(3)     yes   . . . .
C(1)      C(10)     C(12)     C(16)     -58.8(3)    yes   . . . .
C(1)      C(10)     C(12)     C(20)     -178.3(2)   yes   . . . .
H(6)      C(10)     C(12)     C(9)      -57.8(3)    no    . . . .
H(6)      C(10)     C(12)     C(16)     -179.7(3)   no    . . . .
H(6)      C(10)     C(12)     C(20)     60.8(3)     no    . . . .
H(7)      C(10)     C(12)     C(9)      -176.1(3)   no    . . . .
H(7)      C(10)     C(12)     C(16)     62.0(4)     no    . . . .
H(7)      C(10)     C(12)     C(20)     -57.5(4)    no    . . . .
C(18)     C(11)     C(15)     F(2)      -75.8(4)    yes   . . . .
C(18)     C(11)     C(15)     F(3)      165.4(3)    yes   . . . .
C(18)     C(11)     C(15)     F(4)      45.6(3)     yes   . . . .
C(20)     C(11)     C(15)     F(2)      164.4(3)    yes   . . . .
C(20)     C(11)     C(15)     F(3)      45.6(4)     yes   . . . .
C(20)     C(11)     C(15)     F(4)      -74.3(3)    yes   . . . .
H(14)     C(11)     C(15)     F(2)      45.0(4)     no    . . . .
H(14)     C(11)     C(15)     F(3)      -73.8(4)    no    . . . .
H(14)     C(11)     C(15)     F(4)      166.4(3)    no    . . . .
C(15)     C(11)     C(18)     O(2)      -179.3(2)   yes   . . . .
C(15)     C(11)     C(18)     C(6)      58.9(3)     yes   . . . .
C(15)     C(11)     C(18)     H(15)     -62.8(3)    no    . . . .
C(20)     C(11)     C(18)     O(2)      -58.6(3)    yes   . . . .
C(20)     C(11)     C(18)     C(6)      179.6(2)    yes   . . . .
C(20)     C(11)     C(18)     H(15)     57.9(3)     no    . . . .
H(14)     C(11)     C(18)     O(2)      59.7(3)     no    . . . .
H(14)     C(11)     C(18)     C(6)      -62.1(3)    no    . . . .
H(14)     C(11)     C(18)     H(15)     176.2(3)    no    . . . .
C(15)     C(11)     C(20)     O(1)      66.6(3)     yes   . . . .
C(15)     C(11)     C(20)     C(12)     -114.2(3)   yes   . . . .
C(18)     C(11)     C(20)     O(1)      -56.0(3)    yes   . . . .
C(18)     C(11)     C(20)     C(12)     123.2(3)    yes   . . . .
H(14)     C(11)     C(20)     O(1)      -174.0(3)   no    . . . .
H(14)     C(11)     C(20)     C(12)     5.2(4)      no    . . . .
C(9)      C(12)     C(16)     H(11)     58.2(4)     no    . . . .
C(9)      C(12)     C(16)     H(12)     178.4(4)    no    . . . .
C(9)      C(12)     C(16)     H(13)     -61.6(5)    no    . . . .
C(10)     C(12)     C(16)     H(11)     -179.8(3)   no    . . . .
C(10)     C(12)     C(16)     H(12)     -59.7(5)    no    . . . .
C(10)     C(12)     C(16)     H(13)     60.4(4)     no    . . . .
C(20)     C(12)     C(16)     H(11)     -60.3(4)    no    . . . .
C(20)     C(12)     C(16)     H(12)     59.8(5)     no    . . . .
C(20)     C(12)     C(16)     H(13)     179.8(36)   no    . . . .
C(9)      C(12)     C(20)     O(1)      -3.9(4)     yes   . . . .
C(9)      C(12)     C(20)     C(11)     176.9(2)    yes   . . . .
C(10)     C(12)     C(20)     O(1)      -123.7(3)   yes   . . . .
C(10)     C(12)     C(20)     C(11)     57.1(3)     yes   . . . .
C(16)     C(12)     C(20)     O(1)      115.7(3)    yes   . . . .
C(16)     C(12)     C(20)     C(11)     -63.5(3)    yes   . . . .
C(8)      C(13)     C(14)     C(21)     0.2(5)      yes   . . . .
C(8)      C(13)     C(14)     H(18)     -179.8(4)   no    . . . .
H(17)     C(13)     C(14)     C(21)     -179.5(4)   no    . . . .
H(17)     C(13)     C(14)     H(18)     0.5(7)      no    . . . .
C(13)     C(14)     C(21)     C(19)     -0.3(5)     yes   . . . .
C(13)     C(14)     C(21)     H(19)     179.9(72)   no    . . . .
H(18)     C(14)     C(21)     C(19)     179.7(4)    no    . . . .
H(18)     C(14)     C(21)     H(19)     -0.1(7)     no    . . . .
C(6)      C(19)     C(21)     C(14)     -0.5(5)     yes   . . . .
C(6)      C(19)     C(21)     H(19)     179.2(4)    no    . . . .
H(20)     C(19)     C(21)     C(14)     179.4(4)    no    . . . .
H(20)     C(19)     C(21)     H(19)     -0.8(7)     no    . . . .

loop_
_geom_contact_atom_site_label_1
_geom_contact_atom_site_label_2
_geom_contact_distance
_geom_contact_publ_flag
_geom_contact_site_symmetry_1
_geom_contact_site_symmetry_2
F(3)      H(5)      2.801(4)    no    . 45501
F(4)      C(19)     3.429(4)    yes   . 45501
F(4)      H(12)     3.121(4)    no    . 45501
F(4)      H(14)     3.486(4)    no    . 45501
F(4)      H(20)     2.531(4)    no    . 45501
O(1)      C(16)     3.285(4)    yes   . 45501
O(1)      H(11)     3.416(4)    no    . 45501
O(1)      H(12)     2.884(4)    no    . 45501
O(1)      H(13)     3.038(4)    no    . 45501
C(2)      H(4)      3.215(5)    no    . 45501
C(5)      H(1)      3.218(5)    no    . 65501
C(5)      H(6)      3.188(5)    no    . 65501
C(5)      H(8)      3.555(5)    no    . 65501
C(7)      H(6)      3.470(5)    no    . 65501
C(8)      H(2)      3.501(5)    no    . 55401
C(8)      H(19)     3.360(5)    no    . 45501
C(10)     H(4)      3.373(5)    no    . 45501
C(13)     H(2)      3.245(5)    no    . 55401
C(13)     H(3)      3.509(6)    no    . 45401
C(13)     H(18)     3.330(4)    no    . 56502
C(13)     H(19)     3.410(5)    no    . 45501
C(14)     C(3)      3.460(5)    yes   . 55401
C(14)     H(2)      3.180(5)    no    . 55401
C(14)     H(18)     3.299(5)    no    . 56502
C(16)     O(1)      3.285(4)    yes   . 65501
C(19)     F(4)      3.429(4)    yes   . 65501
C(19)     H(16)     3.415(5)    no    . 65501
C(21)     H(2)      3.373(5)    no    . 55401
C(21)     H(3)      3.371(5)    no    . 55401
C(21)     H(16)     3.365(5)    no    . 65501
H(1)      C(5)      3.218(5)    no    . 45501
H(4)      C(2)      3.215(5)    no    . 65501
H(4)      C(10)     3.373(5)    no    . 65501
H(5)      F(3)      2.801(4)    no    . 65501
H(6)      C(5)      3.188(5)    no    . 45501
H(6)      C(7)      3.470(5)    no    . 45501
H(8)      C(5)      3.555(5)    no    . 45501
H(11)     O(1)      3.416(4)    no    . 65501
H(12)     F(4)      3.121(4)    no    . 65501
H(12)     O(1)      2.884(4)    no    . 65501
H(13)     O(1)      3.038(4)    no    . 65501
H(14)     F(4)      3.486(4)    no    . 65501
H(16)     C(19)     3.415(5)    no    . 45501
H(16)     C(21)     3.365(5)    no    . 45501
H(18)     C(3)      3.561(5)    no    . 55401
H(18)     C(13)     3.330(4)    no    . 56502
H(18)     C(14)     3.299(5)    no    . 56502
H(19)     C(8)      3.360(5)    no    . 65501
H(19)     C(13)     3.410(5)    no    . 65501
H(20)     F(4)      2.531(4)    no    . 65501

#==============================================================================

# Additional structures and associated data_? identifiers
# should be added at this point if there is more than one 
# structure analysis in the CIF.

#==============================================================================

#     End of CIF

#==============================================================================
